# Supplementary material
Source: PubMed Central journal article supplement (PMC9846931)

A

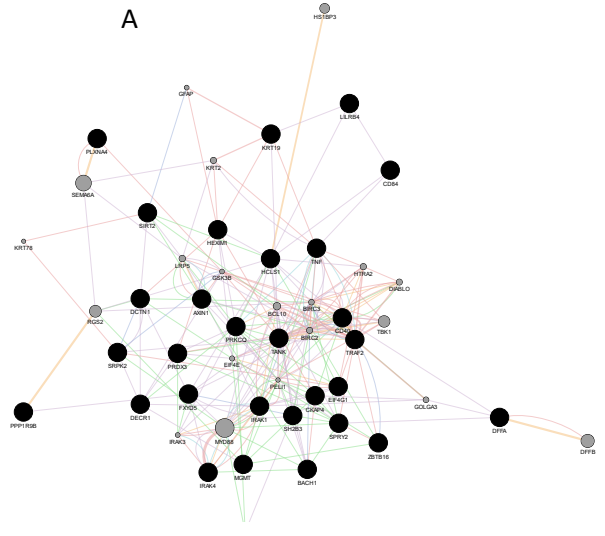

|                       |       |
|-----------------------|-------|
| Physical Interactions | 56.67 |
| Co-expression         | 30.36 |
| Predicted             | 8.60  |
| Co-localization       | 3.36  |
| Pathway               | 0.97  |
| Genetic Interactions  | 0.04  |

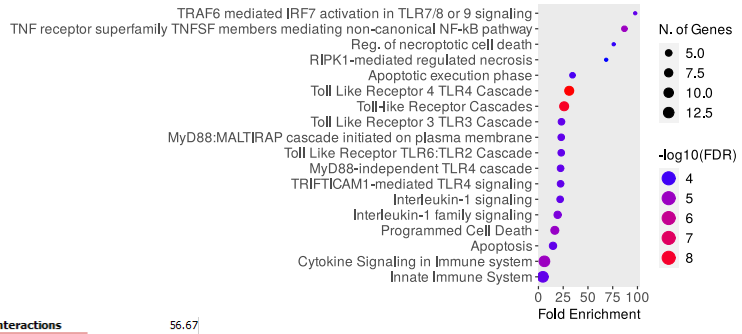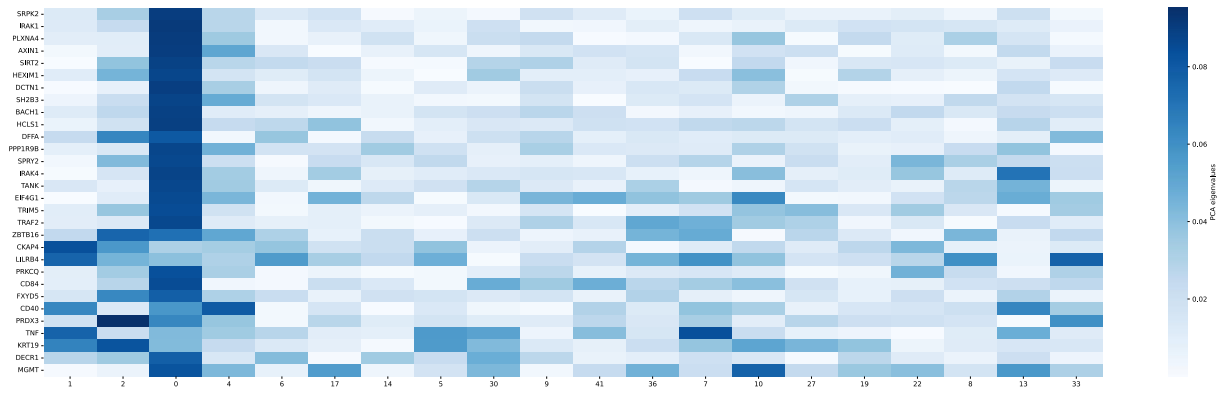

B

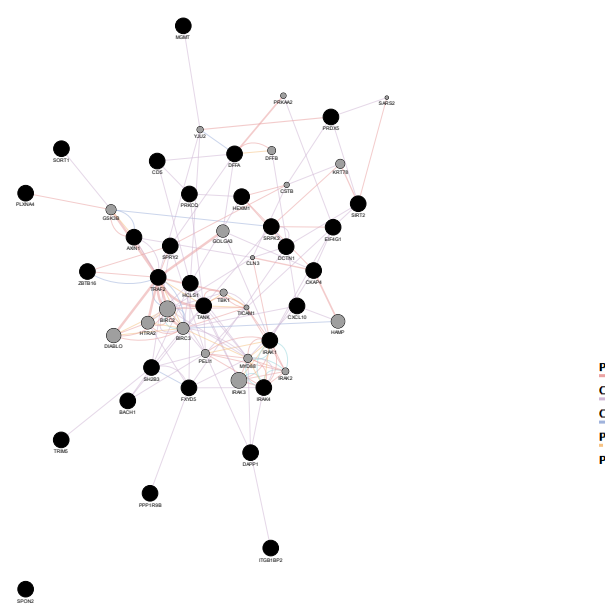

|                       |       |
|-----------------------|-------|
| Physical Interactions | 61.99 |
| Co-expression         | 32.76 |
| Co-localization       | 3.66  |
| Predicted             | 1.57  |
| Pathway               | 0.03  |

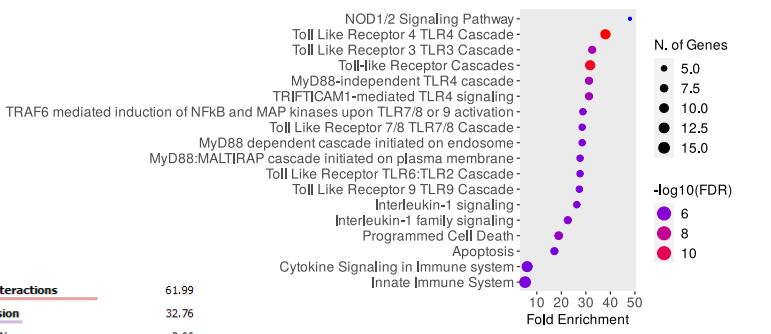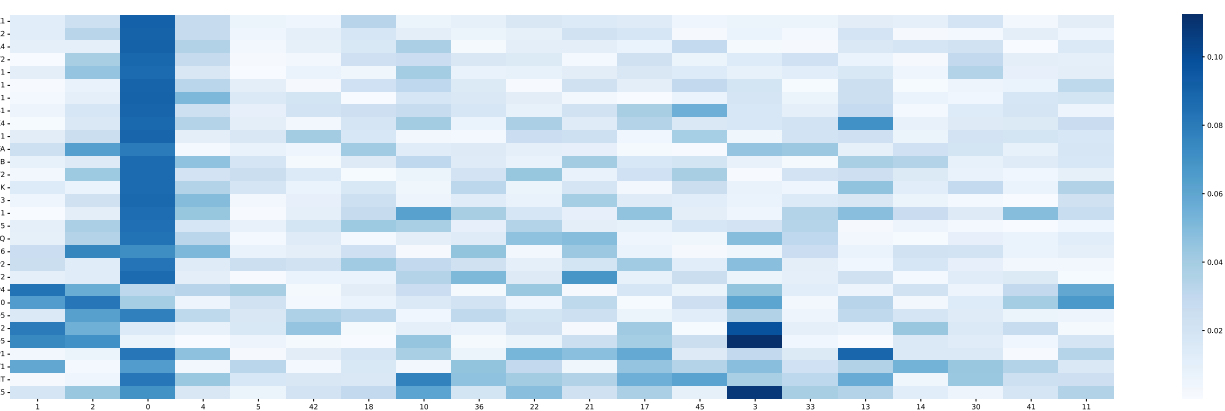

Supplement: mmc9.pdf [file mmc9.pdf]
