# Supplementary material
Source: PubMed Central journal article supplement (PMC9846931)

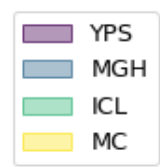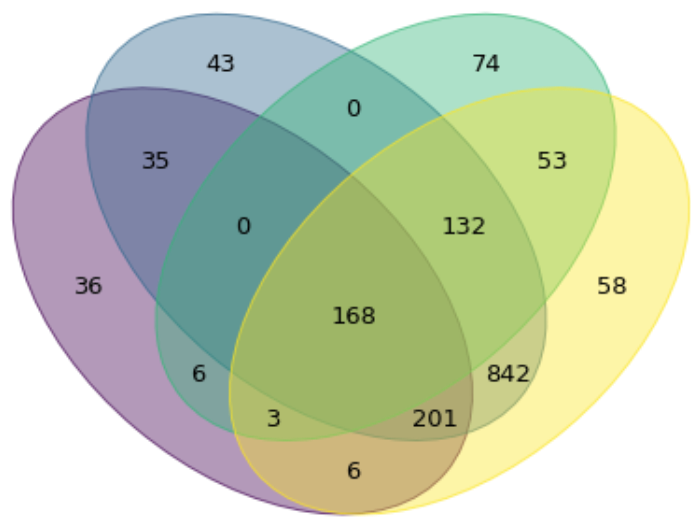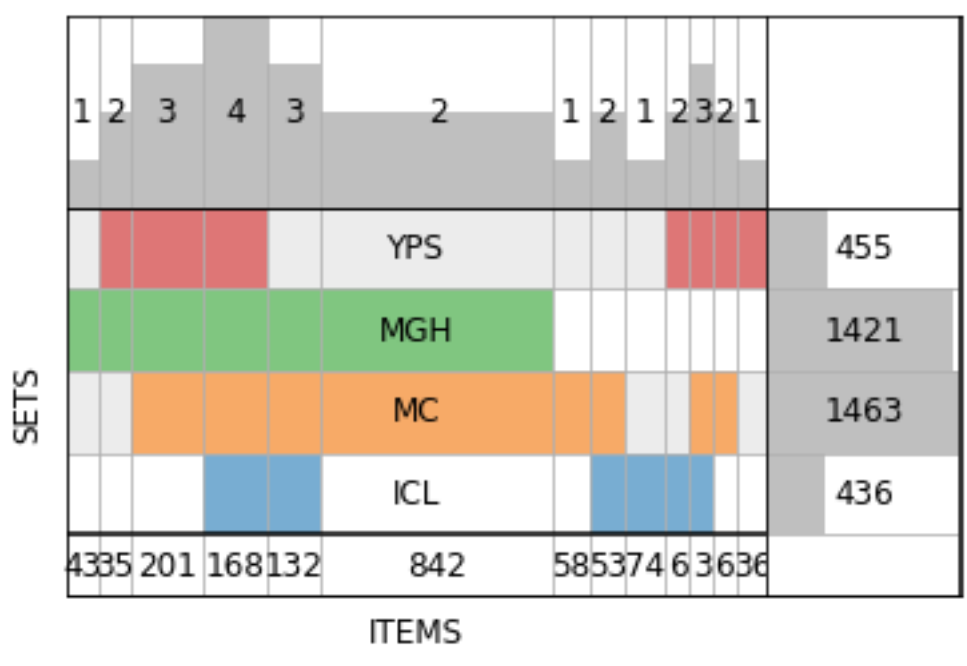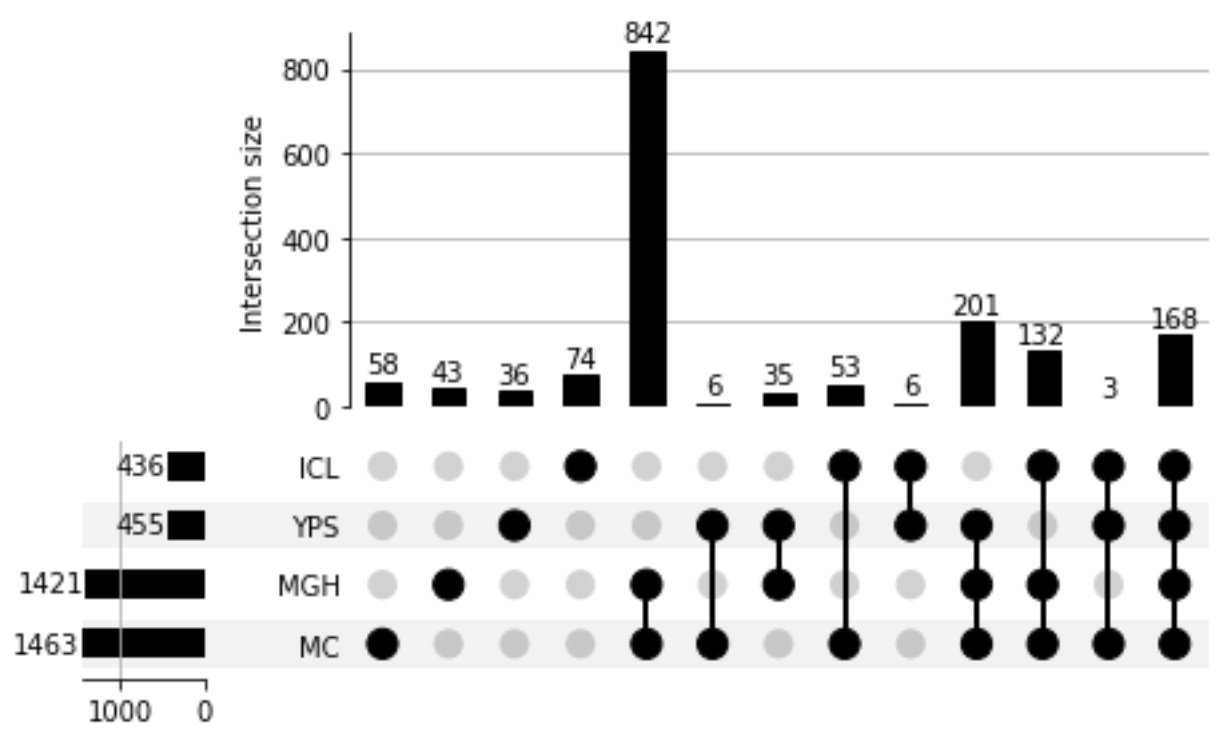

Supplement: mmc1.pdf [file mmc1.pdf]

A

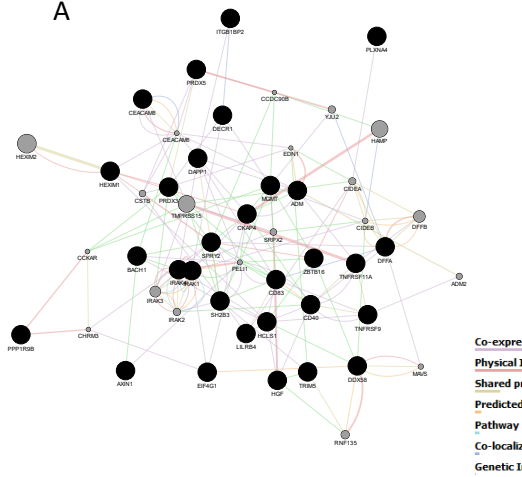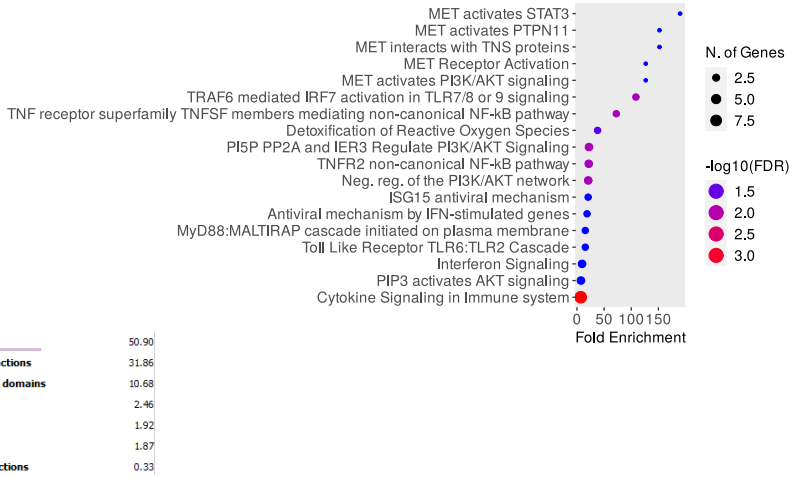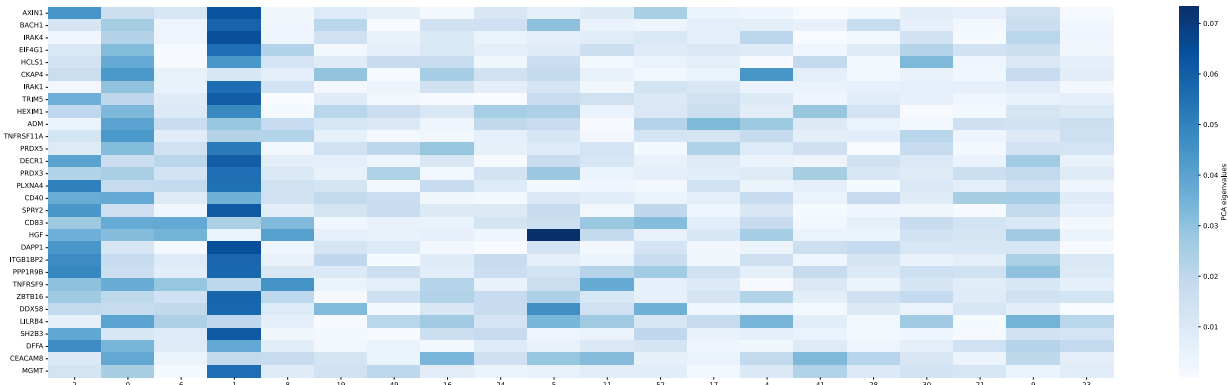

B

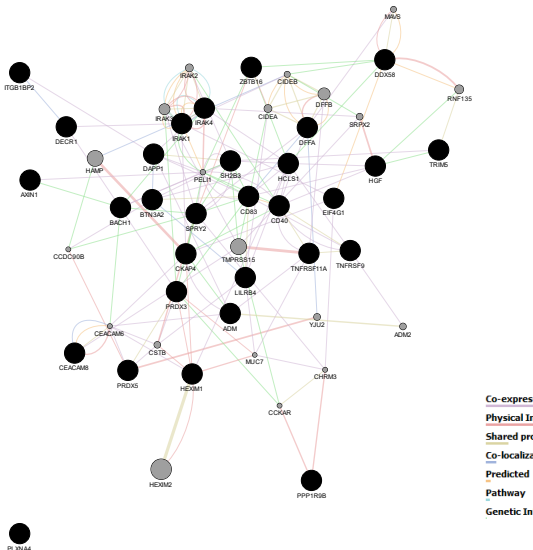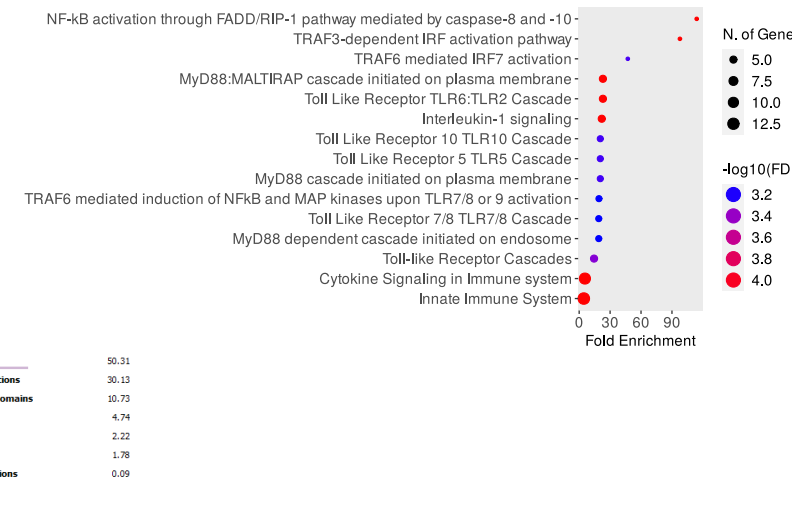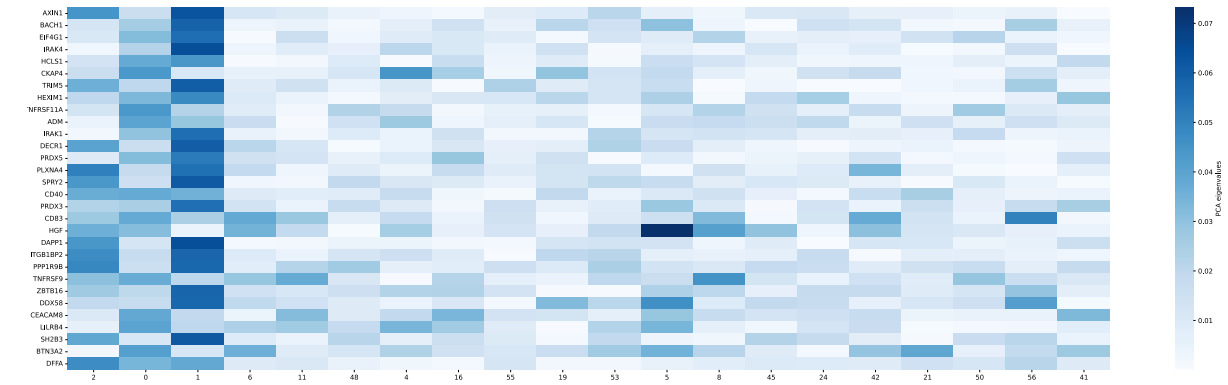

Supplement: mmc8.pdf [file mmc8.pdf]
